# Supplementary material
Source: Springer Nature journal article supplement (https://www.springermedizin.de/resource/supplementary/12916_2009_212_MOESM3_ESM.pdf/9599404)

**Y: PCA 2 (14.6% variance)**

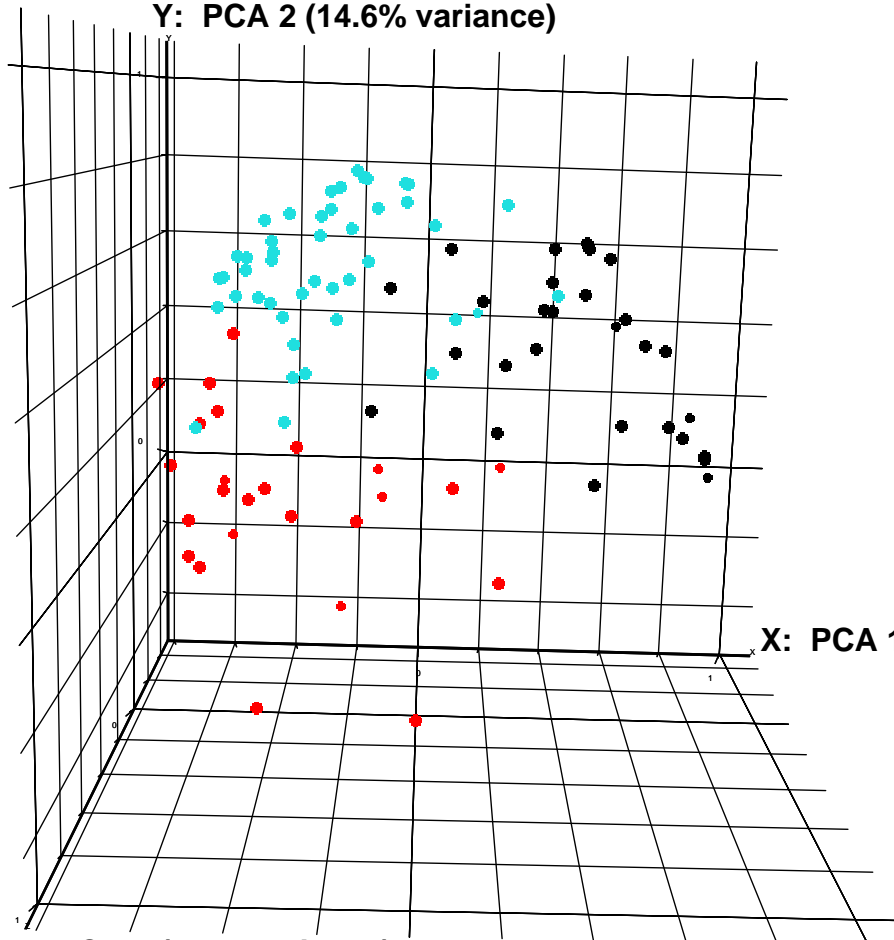

**X: PCA 1 (48.3% variance)**

**Z: PCA 3 (4.2% variance)**

**subclass A (●), subclass B (●) and subclass C (●)**

Supplement: MOESM3 [file 9599404]
